# Supplementary material for: Association between Psychopathological Symptoms and Aggression and Selected Biochemical Parameters in Adolescents with Behavioural and Emotional Disturbances
Source: MDPI journal article supplement (doi:10.3390/ijms24087097), 2023-04-12
Supplement: s1 [file s1]

**Supplementary Materials:**

**Table S1.** Sociodemographic characteristics of the study group based on data obtained from the case history.

| Data               | Characteristics    | n   | %     |
|--------------------|--------------------|-----|-------|
| GENDER             | girls              | 82  | 66.7. |
|                    | boys               | 41  | 33.3  |
| AGE GROUP          | 13–14 years        | 30  | 24.4  |
|                    | 15–18 years        | 93  | 75.6  |
| PLACE OF RESIDENCE | village            | 31  | 25.2  |
|                    | small town         | 8   | 6.5   |
|                    | average-sized town | 35  | 28.5  |
|                    | big town           | 49  | 39.8  |
| FAMILY             | functional         | 16  | 13.0  |
|                    | dysfunctional      | 107 | 87.0  |
| SIBLINGS           | 0                  | 18  | 14.6  |
|                    | 1                  | 45  | 36.6  |
|                    | 2                  | 22  | 17.9  |
|                    | 3                  | 13  | 10.6  |
|                    | 4                  | 12  | 9.8   |
|                    | 5                  | 5   | 4.1   |
|                    | 7                  | 1   | 0.8   |
|                    | 8                  | 7   | 5.7   |

|                                    |                                                                                       |     |      |
|------------------------------------|---------------------------------------------------------------------------------------|-----|------|
|                                    | family home                                                                           | 79  | 64.2 |
|                                    | foster home                                                                           | 20  | 16.3 |
| PLACE OF RESIDENCE                 | institutions (including children's home,<br>municipal care centre, emergency shelter) | 24. | 19.5 |
| ALCOHOL PROBLEM IN THE FAMILY      | no                                                                                    | 62  | 50.4 |
|                                    | yes                                                                                   | 61  | 49.6 |
| MENTAL ILLNESS IN THE FAMILY       | no                                                                                    | 87  | 70.7 |
|                                    | yes                                                                                   | 36  | 29.3 |
| DEATH IN THE FAMILY<br>(LAST YEAR) | no                                                                                    | 118 | 95.9 |
|                                    | yes                                                                                   | 5   | 4.1  |
| SUICIDE IN THE FAMILY              | no                                                                                    | 116 | 94.3 |
|                                    | yes                                                                                   | 7   | 5.7  |

**Table S2.** General, clinical characteristics of the study group.

| Parameters                 | Mean ± SD  | Median | Q1-Q3   |
|----------------------------|------------|--------|---------|
| AGE (years)                | 15.4±1.3   | 15     | 15-17   |
| BODY MASS (kg)             | 61.5±11.6  | 60     | 53-68   |
| HEIGHT (m)                 | 1.66±0.08  | 2      | 2-2     |
| BMI (kg/m <sup>2</sup> )   | 22.3±4.0   | 21     | 19-24   |
| SYSTOLIC PRESSURE (mm Hg)  | 127.3±12.7 | 128    | 120-136 |
| DIASTOLIC PRESSURE (mm Hg) | 75.3±10.7  | 75     | 68-81   |
| PULSE RATE (beats/minute)  | 86.6±13.1  | 87     | 78-93   |
| BODY TEMPERATURE (°C)      | 36.8±0.3   | 37     | 37-37   |

|                             |            |      |          |
|-----------------------------|------------|------|----------|
| HOSPITALIZATION TIME (days) | 19.9±11.9  | 19   | 10-27    |
| WBC (K/ $\mu$ L)            | 6.3±1.4    | 6    | 5-7      |
| RBC (M/ $\mu$ L)            | 4.7±0.5    | 5    | 4-5      |
| HGB (g/dL)                  | 13.5±1.4   | 13   | 12-14    |
| HCT (%)                     | 40.3±3.7   | 40   | 37-43    |
| PLT (K/ $\mu$ L)            | 259.8±64.7 | 256  | 218-299  |
| ESR (mm)                    | 9.0±7.1    | 7    | 4-11     |
| SODIUM (mmol/l)             | 140.2±2.3  | 140  | 139-142  |
| POTASSIUM (mmol/l)          | 4.3±0.3    | 4    | 4-5      |
| GLUCOSE (mg/dl)             | 84.3±7.7   | 84   | 79-90    |
| CREATININE (mg/dl)          | 0.6±0.1    | 1    | 1-1      |
| ALT (U/l)                   | 20.6±44.0  | 14   | 11-18    |
| AST (U/l)                   | 20.7±7.8   | 18   | 16-23    |
| CRP (mg/l)                  | 1.2±2.1    | 0    | 0-1      |
| TSH ( $\mu$ U/ml)           | 2.1±1.0    | 2    | 1-3      |
| CORTISOL ( $\mu$ g/l)       | 134.8±68.6 | 132  | 88-173   |
| BDNF (pg/ml)                | 2391±2331  | 1655 | 663-3080 |

SD – standard deviation, Q1-Q3 – lower quartile, upper quartile.

BMI – body mass index, WBC – white blood cell count, RBC – red blood cell count, HGB – haemoglobin concentration, HCT – hematocrit, PLT – platelet count, ESR – erythrocyte sedimentation rate (red blood cell descent rate), ALT – alanine aminotransferase, AST – aspartate aminotransferase, CRP – C-reactive protein, TSH – thyrotropin, BDNF – neurotrophic brain-derived factor

**Table S3.** Characteristics of the study group based on data from psychometric tests.

| Trait dimensions | Mean $\pm$ SD | Median | Q1-Q3 |
|------------------|---------------|--------|-------|
|------------------|---------------|--------|-------|

---

|          |           |    |       |
|----------|-----------|----|-------|
| SOM_SCL  | 1.0±0.9   | 1  | 0-2   |
| OC_SCL   | 1.4±1.1   | 1  | 1-2   |
| SENS_SCL | 1.5±1.0   | 1  | 1-2   |
| DEP_SCL  | 1.8±1.1   | 2  | 1-2   |
| ANX_SCL  | 1.3±1.1   | 1  | 0-2   |
| ANG_SCL  | 1.4±1.0   | 1  | 1-2   |
| PHO_SCL  | 0.9±1.0   | 1  | 0-2   |
| PAR_SCL  | 1.4±1.1   | 1  | 1-2   |
| PSY_SCL  | 1.0±0.9   | 1  | 0-2   |
|          |           |    |       |
| A_BP     | 21.0±5.8  | 21 | 17-25 |
| PA_BP    | 23.7±8.5  | 23 | 17-30 |
| H_BP     | 25.4±6.8  | 25 | 21-31 |
| VA_BP    | 15.3±4.3  | 15 | 12-19 |
| SUM_BP   | 85.4±20.5 | 85 | 73-97 |

---

SD – standard deviation, Q1-Q3 – lower quartile, upper quartile.

SCL-90 Questionnaire: SOM\_SCL – somatization, OC\_SCL – obsessive-compulsive, Sens\_SCL – interpersonal sensibility, DEP\_SCL – depression, ANX\_SCL – anxiety, ANG\_SCL – anger-hostility, PHO\_SCL – phobic-anxiety, PAR\_SCL – paranoid ideation, PSY\_SCL – psychoticism. Buss-Perry Questionnaire: A\_BP – anger, PA\_BP – physical aggression, H\_BP – hostility, VA\_BP – verbal aggression, SUM\_BP – sum.
